# Supplementary material
Source: PubMed Central journal article supplement (PMC11028999)
Supplement: 262_2015_1755_MOESM1_ESM.pdf [file 262_2015_1755_MOESM1_ESM.pdf]

Supplementary Figure 1

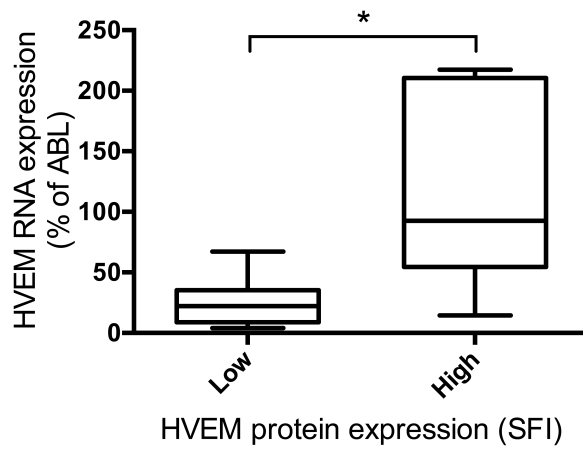

**Supplementary Figure 1. Correlation between surface protein and RNA expression of HVEM in AML samples.** HVEM RNA expression relative to ABL was determined for 8 samples with low and 6 samples with high HVEM surface protein expression. Significantly higher RNA expression ( $p=0.02$ ) was found for the samples with high surface protein expression.

## Supplementary Figure 2

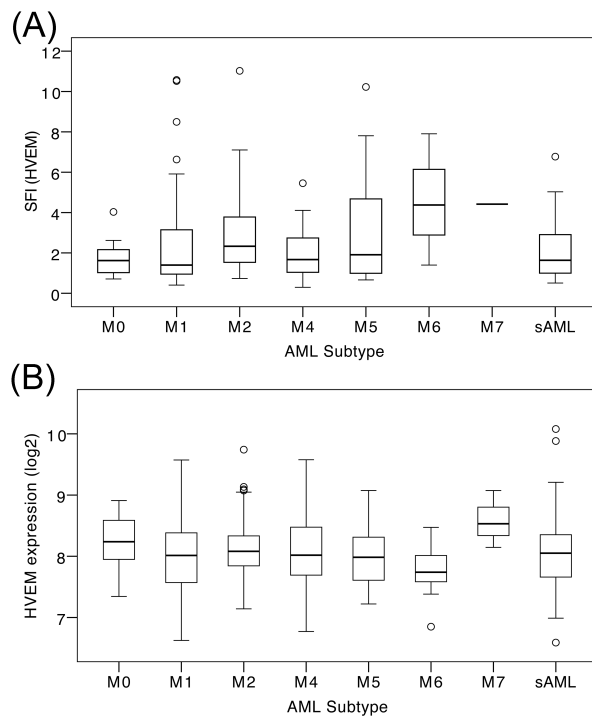

**Supplementary Figure 2. Correlation of HVEM expression with morphology.** HVEM surface protein **(A)** and mRNA **(B)** expression levels were correlated with morphologic characteristics of the AML. No significant and consistent difference in expression levels was detected between the different FAB subtypes or in cases of secondary AML.

### Supplementary Figure 3

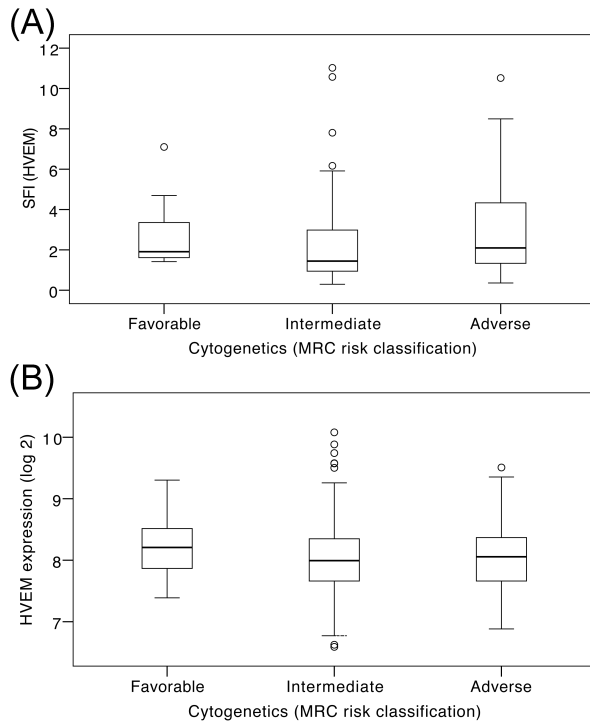

**Supplementary Figure 3. Correlation of HVEM expression with cytogenetics.** HVEM surface protein **(A)** and mRNA **(B)** expression levels were correlated with the cytogenetic risk groups according to the refined MRC criteria. No significant and consistent difference in expression levels was detected between the three risk groups.

**Supplementary Table 1**

| Gene     | Description                                                               | p-value | Adjusted p-value | Log fold change | Biological function of protein                                                                           | Significance of protein for AML                                                                  |
|----------|---------------------------------------------------------------------------|---------|------------------|-----------------|----------------------------------------------------------------------------------------------------------|--------------------------------------------------------------------------------------------------|
| HOXA9    | homeobox A9                                                               | <0.001  | <0.001           | -1.875          | Transcription factor; key role in hematopoiesis                                                          | High expression has negative impact on prognosis [1,2]                                           |
| MEIS1    | Meis homeobox 1                                                           | <0.001  | <0.001           | -1.279          | Transcription factor                                                                                     | Cofactor of HOXA9; increases transformation efficiency of HOXA9 [1]                              |
| HOXA5    | homeobox A5                                                               | <0.001  | <0.001           | -1.268          | Transcription factor                                                                                     | Overexpression often associated with HOXA9; high expression has negative impact on prognosis [2] |
| SEPP1    | selenoprotein P, plasma, 1                                                | <0.001  | <0.001           | -1.225          | Extracellular glycoprotein; function as antioxidant                                                      | –                                                                                                |
| PBX3     | pre-B-cell leukemia homeobox 3                                            | <0.001  | <0.001           | -1.138          | Transcription factor                                                                                     | Critical cofactor of HOXA9 in leukemogenesis [3]                                                 |
| HLA-DPA1 | major histocompatibility complex, class II, DP alpha 1                    | <0.001  | <0.001           | 1.024           | HLA class II alpha chain paralogue                                                                       | –                                                                                                |
| ST18     | suppression of tumorigenicity 18 (breast carcinoma) (zinc finger protein) | <0.001  | <0.001           | 1.046           | Transcription factor                                                                                     | Part of a validated set of genes used for MRD monitoring in pediatric AML [4]                    |
| TGFBI    | transforming growth factor, beta-induced, 68kDa                           | <0.001  | <0.001           | 1.052           | Cytokine; role in proliferation, differentiation and immune system                                       | Pro-survival effect for AML cells in bone marrow niche [5]                                       |
| MN1      | meningioma (disrupted in balanced translocation) 1                        | <0.001  | 0.001            | 1.089           | Transcriptional coactivator                                                                              | High expression has negative impact on prognosis [6]                                             |
| CD34     | CD34 molecule                                                             | <0.001  | <0.001           | 1.133           | Cell surface glycoprotein; function in cell-cell adhesion                                                | CD34 <sup>+</sup> /CD38 <sup>-</sup> AML cells are enriched for leukemic stem cells [7]          |
| HPGDS    | hematopoietic prostaglandin D synthase                                    | <0.001  | <0.001           | 1.231           | Sigma class glutathione-S-transferase; role in production of prostanoids in immune system and mast cells | –                                                                                                |
| LPAR6    | lysophosphatidic acid receptor 6                                          | <0.001  | <0.001           | 1.309           | G protein-coupled receptor                                                                               | –                                                                                                |
| PROM1    | prominin 1                                                                | <0.001  | <0.001           | 1.528           | Pentaspans membrane protein; role in organization of cell membrane topology                              | Expression on AML cells has negative impact on prognosis [8]                                     |

**Supplementary Table 1. Genes significantly associated with *HVEM* expression.** Differential gene expression analysis by Limma showed 13 probe sets with an expression highly significantly associated with the *HVEM*<sup>high</sup> group ( $p \leq 0.001$  and fold change  $\geq 1$ ). A very brief description of the biological function of these genes as well as the significance for AML, if applicable, is provided.

1. Lawrence HJ, Rozenfeld S, Cruz C, Matsukuma K, Kwong A, Kömüves L, Buchberg AM, Largman C (1999) Frequent co-expression of the HOXA9 and MEIS1 homeobox genes in human myeloid leukemias. *Leukemia* 13:1993-1999
2. Zhao P, Tan L, Ruan J, Wei XP, Zheng Y, Zheng LX, Jiang WQ, Fang WJ (2015) Aberrant Expression of HOXA5 and HOXA9 in AML. *Asian Pac J Cancer Prev* 16:3941-3944
3. Li Z, Zhang Z, Li Y, Arnovitz S, Chen P, Huang H, Jiang X, Hong GM, Kunjamma RB, Ren H, He C, Wang CZ, Elkahloun AG, Valk PJ, Döhner K, Neilly MB, Bullinger L, Delwel R, Löwenberg B, Liu PP, et al (2013) PBX3 is an important cofactor of HOXA9 in leukemogenesis. *Blood* 121:1422-1431
4. Steinbach D, Bader P, Willasch A, Bartholomae S, Debatin KM, Zimmermann M, Creutzig U, Reinhardt D, Gruhn B (2015) Prospective validation of a new method of monitoring minimal residual disease in childhood acute myelogenous leukemia. *Clin Cancer Res* 21:1353-1359
5. Tabe Y, Shi YX, Zeng Z, Jin L, Shikami M, Hatanaka Y, Miida T, Hsu FJ, Andreeff M, Konopleva M (2013) TGF- $\beta$ -Neutralizing Antibody 1D11 Enhances Cytarabine-Induced Apoptosis in AML Cells in the Bone Marrow Microenvironment. *PLoS One* 8:e62785
6. Metzeler KH, Dufour A, Benthaus T, Hummel M, Sauerland MC, Heinecke A, Berdel WE, Büchner T, Wörmann B, Mansmann U, Braess J, Spiekermann K, Hiddemann W, Buske C, Bohlander SK (2009) ERG expression is an independent prognostic factor and allows refined risk stratification in cytogenetically normal acute myeloid leukemia: a comprehensive analysis of ERG, MN1, and BAALC transcript levels using oligonucleotide microarrays. *J Clin Oncol* 27:5031-5038
7. Bonnet D, Dick JE (1997) Human acute myeloid leukemia is organized as a hierarchy that originates from a primitive hematopoietic cell. *Nat Med* 3:730-737
8. Tolba FM, Foda ME, Kamal HM, Elshabrawy DA (2013) Expression of CD133 in acute leukemia. *Med Oncol* 30:527

## Supplementary Table 2

| NAME                                                    | ES    | NES   | NOM p-val | FDR q-val |
|---------------------------------------------------------|-------|-------|-----------|-----------|
| KEGG_PRIMARY_IMMUNODEFICIENCY                           | 0.721 | 1.785 | <0.001    | 0.105     |
| KEGG_HEMATOPOIETIC_CELL_LINEAGE                         | 0.688 | 1.703 | <0.001    | 0.153     |
| KEGG_LEUKOCYTE_TRANSENDOTHELIAL_MIGRATION               | 0.554 | 1.816 | 0.004     | 0.139     |
| KEGG_NATURAL_KILLER_CELL_MEDIATED_CYTOTOXICITY          | 0.587 | 1.704 | 0.011     | 0.199     |
| KEGG_NON_SMALL_CELL_LUNG_CANCER                         | 0.438 | 1.596 | 0.014     | 0.348     |
| KEGG_AXON_GUIDANCE                                      | 0.381 | 1.552 | 0.018     | 0.447     |
| KEGG_T_CELL_RECEPTOR_SIGNALING_PATHWAY                  | 0.516 | 1.637 | 0.025     | 0.271     |
| KEGG_VIRAL_MYOCARDITIS                                  | 0.420 | 1.464 | 0.037     | 0.478     |
| KEGG_GLYCOSPHINGOLIPID_BIOSYNTHESIS_GANGLIO_SERIES      | 0.539 | 1.510 | 0.039     | 0.446     |
| KEGG_VASCULAR_SMOOTH_MUSCLE_CONTRACTION                 | 0.363 | 1.472 | 0.040     | 0.492     |
| KEGG_B_CELL_RECEPTOR_SIGNALING_PATHWAY                  | 0.515 | 1.513 | 0.045     | 0.485     |
| KEGG_LONG_TERM_POTENTIATION                             | 0.365 | 1.507 | 0.052     | 0.413     |
| KEGG_GLYCOSAMINOGLYCAN_BIOSYNTHESIS_CHONDROITIN_SULFATE | 0.592 | 1.516 | 0.053     | 0.531     |
| KEGG_REGULATION_OF_ACTIN_CYTOSKELETON                   | 0.348 | 1.440 | 0.055     | 0.484     |

### Supplementary Table 2. Gene sets significantly associated with *HVEM* expression.

Gene set enrichment analysis (GSEA) showed 11 gene sets enriched in the *HVEM*<sup>high</sup>

group at  $p < 0.05$ . Four gene sets were enriched at a false discovery rate  $< 0.25$ .
